# Supplementary material for: Rapid area deactivation for blocking atomic layer deposition processes using polystyrene brush layers
Source: Royal Society of Chemistry journal article supplement (doi:10.1039/d2tc00577h), 2022-01-01
Supplement: d2tc00577h1.pdf [file d2tc00577h1.pdf]

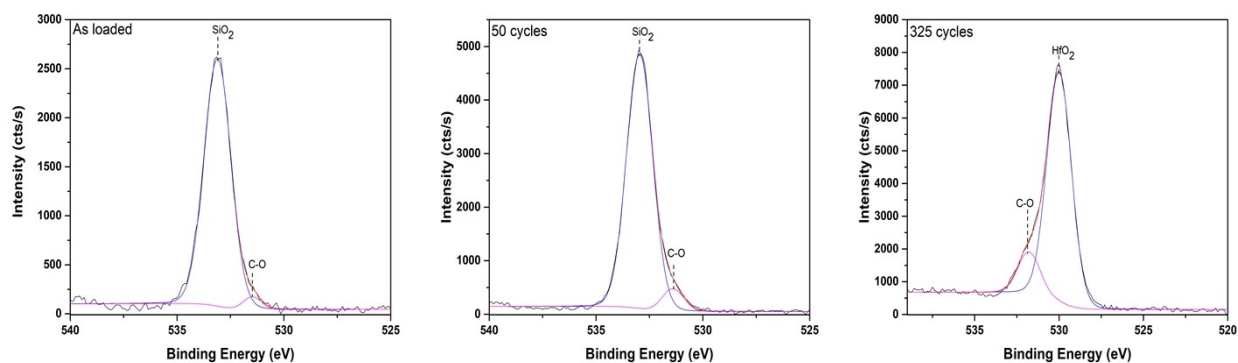

Figure S1 O1s high resolution spectra of 16K 1.5wt% as loaded, 50 and 325 cycles into the ALD process.

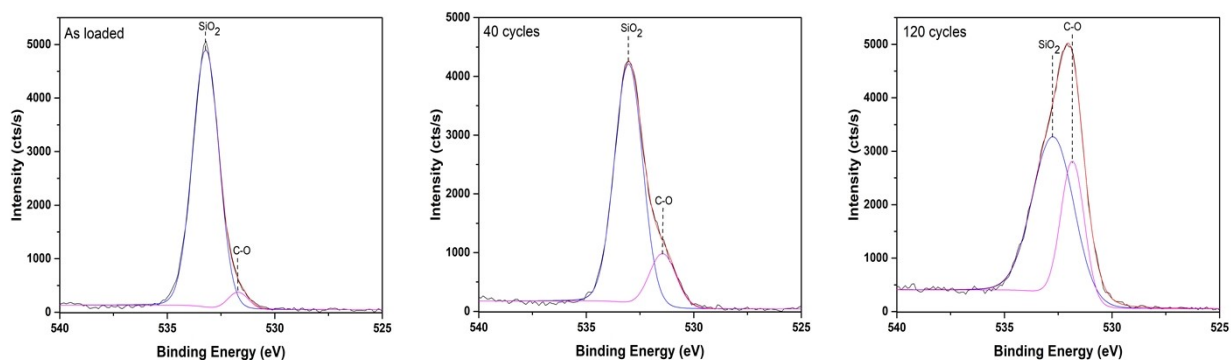

Figure S2 O1s high resolution spectra of 40K 0.2wt% as loaded, 50 and 120 cycles into the ALD process.

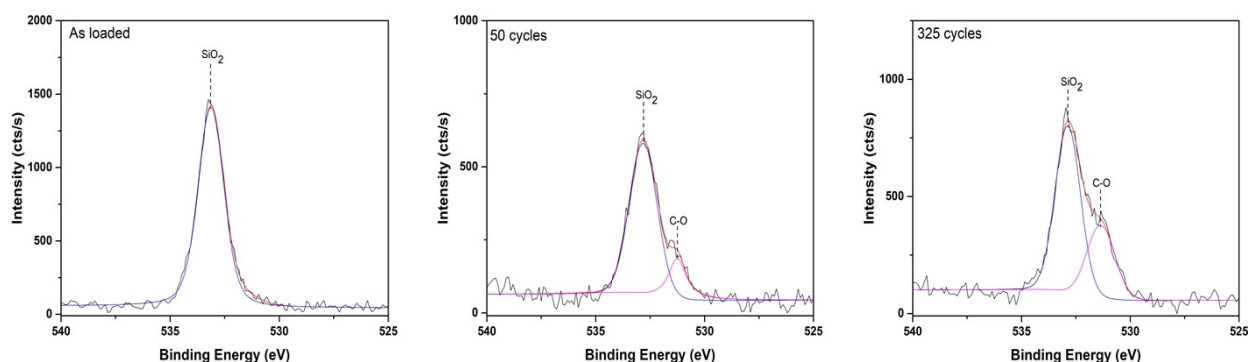

Figure S3 O1s high resolution spectra of 40K 1.5wt% as loaded, 50 and 325 cycles into the ALD process.
